# Supplementary material
Source: publisher figshare collection journal article supplement (https://acs.figshare.com/ndownloader/files/8201372)
Supplement: Supplementary file 1 [file 8201372]

## Supporting Information

### **Economic Impacts from PM<sub>2.5</sub> Pollution-Related Health Effect: A Case Study in Shanghai**

Rui Wu,<sup>a,c,e</sup> Hancheng Dai,<sup>\*,b</sup> Yong Geng,<sup>\*,c</sup> Yang Xie,<sup>d,f</sup> Toshihiko Masui,<sup>d</sup> Zhiqing Liu,<sup>c</sup> Yiyang Qian,<sup>c</sup>

<sup>a</sup> Key Lab on Pollution Ecology and Environmental Engineering, Institute of Applied Ecology, Chinese Academy of Sciences, No.72 Wenhua Road, Shenyang, 110016, China

<sup>b</sup> College of Environmental Sciences and Engineering, Peking University, No.5 Yiheyuan Road, Beijing, 100871, China

<sup>c</sup> School of Environmental Science and Engineering, Shanghai Jiao Tong University, No. 800 Dongchuan Road, Minhang, Shanghai, 200240, China

<sup>d</sup> Social and Environmental Systems Division, National Institute for Environmental Studies, 16-2 Onogawa, Tsukuba City, Ibaraki, 305-8506, Japan

<sup>e</sup> University of Chinese Academy of Sciences, No.19A Yuquan Road, Beijing, 100049, China

<sup>f</sup> Department of Social Engineering, Tokyo Institute of Technology, 2-12-1 Ookayama, Meguro-ku, Tokyo 152-8550, Japan

Corresponding Author

\*Hancheng Dai; Email: dai.hancheng@pku.edu.cn; Tel: +86-10-62764974; Fax: +86-10-62764974

\*Yong Geng; Email: ygeng@sjtu.edu.cn; Tel: +86-21-54748019; Fax: +86-21-54740825.

### Summary

The supporting information includes 26 pages, 4 figures, 2 tables and 35 references.

## GAINS MODEL

GAINS model is an integrated assessment model dealing with costs and potentials for air pollution control and greenhouse gas (GHG) mitigation, and assessing interactions between policies.<sup>1,2</sup> The GAINS-China model provides annual average PM<sub>2.5</sub> concentration, air pollutant emissions and pollution control costs data for Shanghai. The basic principles of calculating emissions and emission control costs in the model present in Eq. 1 and 2.

### Equation 1:

$$Emissions = \sum_i Activity_i \times F \times (1-r) \times C$$

### Equation 2:

$$Costs = \sum_i Activity_i \times U \times C$$

Components appearing on the right side of the equations are organized into three different data categories: activity pathways, emission vectors, and control strategies. Each emission scenario in GAINS is created through a combination of these three data categories. Emissions-generating economic *Activities* are organized into activity pathways which are divided into five groups: Agriculture (AGR), Energy (ENE), Mobile (MOB), Process (PROC), and VOC sources (VOCP). This study mainly focuses on Energy and Mobile sources activity.  $F$  (emission factors of activities),  $r$  (removal efficiencies of control technologies),  $U$  (unit cost of control technologies), together with all background information, form the so-called emission vectors. Finally,  $C$  (control technologies) for each activity are specified in control strategies. Emissions and control costs of each emission scenario are the sum of all  $i$  activities.

Based on the detailed spatial and sectoral GAINS emission inventory, GAINS computes fields of ambient concentrations of PM<sub>2.5</sub> with the help of source-receptor relationships derived from an atmospheric chemistry-transport model named TM5 model. The model computed contributions from (i) primary particulate matter released from anthropogenic sources, (ii) secondary inorganic aerosols formed from anthropogenic emissions of SO<sub>2</sub>, NO<sub>x</sub> and NH<sub>3</sub>, (iii) particulate matter from natural sources (soil dust, sea salt, biogenic sources).

## HEALTH MODULE

The health module is based on reference<sup>3</sup>.

### Health endpoint

All results are region  $r$ , year  $y$ , scenario  $s$ , and uncertainty range  $g$  specific. For simplification, they are omitted in the following description.

Exposure to incremental  $PM_{2.5}$  pollutant leads to health problems called health endpoints, which are categorized into morbidity and chronic mortality (Table S1). Most studies<sup>4-6</sup> indicate that the Relative Risk (RR) for the endpoint is in a linear relationship with the concentration level, recent studies<sup>7,8</sup> argue that it is in a non-linear relationship, especially at high concentrations. As showed in Eq. 3 and 4, in this study, we adopted both linear and non-linear functions. When the concentration is lower than the threshold value of  $10 \mu\text{g}/\text{m}^3$ , RR is 1, which causes no health impacts. Linear function assumes that the concentration-response function (CRF) is a constant. For mortality, we adopted China-specific linear function from ref<sup>9</sup> and cause-specific log-linear function based on the lookup table in.<sup>7</sup> The number of health endpoints is estimated by multiplying RR with population and reported cause-specific mortality rate.

#### Equation 3:

$$RR_{p,r,s,y,m,e,g}(C) = \begin{cases} 1, & \text{if } C_{p,r,s,y} \leq C0_p \\ 1 + CRF_{m,e,g} \times (C_{p,r,s,y} - C0_p), & \text{linear function, if } C_{p,r,s,y} > C0_p \\ 1 + \alpha \times e^{(-\gamma \times (C_{p,r,s,y} - C0_p)^\delta)}, & \text{nonlinear function, if } C_{p,r,s,y} > C0_p \end{cases}$$

#### Equation 4:

$$EP_{p,r,s,y,m,e,g}(C) = \begin{cases} P_{r,y,m} \times (RR_{p,r,s,y,m,e,g}(C) - 1), & \text{for linear morbidity function} \\ P_{r,y,m} \times (RR_{p,r,s,y,m,e,g}(C) - 1) \times I_{r, \text{"all cause"}}, & \text{for linear mortality function} \\ P_{r,y,m} \times (RR_{p,r,s,y,m,e,g}(C) - 1) \times \hat{I}_{r,e}, & \text{for nonlinear mortality function,} \end{cases}$$

where

- **RR(C)**: Relative risk for endpoint at concentration  $C$  [case/person/year or day/person/year]
- **EP**: Health endpoint [case/year or day/year]
- **C**: Concentration level of pollutant
- **C0**: Threshold concentration that causes health impacts ( $10 \mu\text{g}/\text{m}^3$  for  $PM_{2.5}$ )
- **CRF**: Concentration-response function

- **P**: Population, aged 14-65 for work loss day, age 25-65 for Ischemic heart disease and Stroke, and entire cohort for other endpoints
- $\hat{I}$ : (cause-specific mortality rate) defined in ref<sup>7</sup>
- **I**: Reported average annual disease incidence (mortality) rate for endpoint
- $I_{r,"all\ cause"}$ : Reported average annual natural death rate for endpoint
- $\alpha$ ,  $\gamma$ ,  $\delta$ : Parameters that determine the shape of the non-linear concentration-response relationship for chronic mortality.
- Suffix p, r, s, y, m, e, g represent pollutant (PM<sub>2.5</sub>), region, scenario, year, endpoint category (morbidity or mortality), endpoint, value range (medium, low and high), respectively.

### Annual per capita work loss rate

Annual total work loss day (WLD) of a region is a summation of work loss day from morbidity and cumulative work loss day from chronic mortality aged from 14 to 65 years old (Eq. 5). Based on death rates for different age group and cause-specific mortality from China health statistics, we assume 4% of total chronic mortality is aged between 14 and 65 years old. Annual per capita work loss rate (WLR) is obtained by dividing WLD with working population and annual working days (Eq. 6). In the CGE model, WLR is used to calculate the actual labor force after subtracting the work loss (Eq. 7).

#### Equation 5:

$$WLD_{p,r,s,y,g} = \sum_m (EP_{p,r,s,y,m,"wld",g}) + \sum_{e,y' < y} (EP_{p,r,s,y',"mt",e,g}) \times 0.04 \times DPY$$

#### Equation 6:

$$WLR_{p,r,s,y,g} = \frac{WLD_{p,r,s,y,g}}{DPY \times P_{r,y,"14-65"}}$$

#### Equation 7:

$$LAB_{p,r,s,y,g} = LAB0_{r,"ref",y}$$

Where

- **WLD**: Annual work loss day [day/year]
- **WLR**: Annual per capita work loss rate
- **"wld"**: Subset "Work loss day" of e
- **"mt"**: Subset "Chronic mortality" of m

- **LAB**: Labor force after considering work loss
- **LAB0**: Labor force in the reference scenario
- **DPY**: Per capita annual working days (5 day/week \* 52 week/year = 260 day/year)

### Health expenditure

Additional health expenditure is obtained by multiplying outpatient and hospital admission price with total endpoints (Eq. 8). The price is a function of per capita GDP of each province (Eq. 9), and the parameters  $\beta$ ,  $\theta$  are estimated through regression analysis of statistical price by disease and GDP of each province from 2003 to 2012. Additional medical expenditure is regarded as household expenditure pattern change, which means as more money is spent on medical services, less is available on other commodities.

#### Equation 8:

$$HE_{p,r,s,y,g} = PR_{r,s,y,e,g} \times EP_{p,r,s,y,m,e,g}$$

#### Equation 9:

$$PR_{r,s,y,e} = \beta \times GDPPC_{r,s,y} + \theta_{r,e}$$

Where:

- **HE**: Total additional health expenditure [billion Yuan/year]
- **PR**: Price of medical service [Yuan/case]
- **GDPPC**: Per capita Gross Domestic Production from CGE model
- $\beta$ ,  $\theta$ : Parameters derived from regression analysis of medical service price

**Table S1: Exposure-Response Functions for health endpoints**

| Category                 | Endpoint                              | Unit                                       | Medium              | C.I. (95%) |          |
|--------------------------|---------------------------------------|--------------------------------------------|---------------------|------------|----------|
|                          |                                       |                                            |                     | Low        | High     |
| <b>Morbidity</b>         | Work loss day                         | day/person                                 | 2.07E-02            | 1.76E-02   | 2.38E-02 |
|                          | Respiratory hospital admissions       | / $\mu\text{g}\cdot\text{m}^3/\text{year}$ | 1.17E-05            | 6.38E-06   | 1.72E-05 |
|                          | Cerebrovascular hospital admission    | case/person                                | 8.40E-06            | 6.47E-07   | 1.16E-05 |
|                          | Cardiovascular hospital admissions    | / $\mu\text{g}\cdot\text{m}^3/\text{year}$ | 7.23E-06            | 3.62E-06   | 1.09E-05 |
|                          | Chronic bronchitis                    |                                            | 4.42E-05            | -1.82E-06  | 9.02E-05 |
|                          | Asthma attacks                        |                                            | 1.22E-04            | 4.33E-05   | 1.21E-03 |
|                          | Respiratory symptoms days             |                                            | 2.50E-02            | 2.17E-01   | 4.05E-01 |
| <b>Chronic mortality</b> | All cause (International)             |                                            | 0.004               | 0.0003     | 0.008    |
|                          | All cause (China-specific)            |                                            | 0.0009              | -0.0003    | 0.0018   |
|                          | Chronic obstructive pulmonary disease |                                            | Non-linear function |            |          |

Lung cancer  
Ischemic heart disease (35-65 y)  
Stroke (35-65 y)  
Lower respiratory infections

---

Source: <sup>7,9-11</sup>

## THE CGE MODEL

### The CGE model

The CGE model could capture the full range of interaction and feedback effects between different agents in the economic system. It has been widely used to assess the economic and environmental impacts of different climate policies at global<sup>12-14</sup>, national<sup>15,16</sup> levels. The model is a two-region dynamic CGE model that includes Shanghai and the Rest of China (ROC) based on the provincial CGE model developed by Dai et al.<sup>17</sup>

The CGE model applied in this study can be classified as a multi-sector, multi-region, recursive dynamic CGE model that covers 22 economic commodities and corresponding sectors, and eight power generation technologies. This CGE model is solved by MPSGE/GAMS<sup>18</sup> at a one-year time step. It has been used widely for assessing China's climate mitigation at the national<sup>17,19,20</sup> and provincial<sup>3,21-27</sup> levels.

Major model features are similar to the one-region version<sup>17</sup>, including a production block, a market block with domestic and international transactions, as well as government and household incomes and expenditures blocks. The model is comprised of 42 sectors, which are classified into basic and energy transformation sectors, and seven power generation technologies. Activity output for each sector follows a nested constant elasticity of substitution (CES) production function. Inputs are categorized into material commodities, energy commodities, labor, capital and resources. Technical descriptions are provided in the Appendix.

### Data collection and treatments

Data required by this model include the input-output table of Shanghai and China<sup>28,29</sup>, energy balance tables<sup>30,31</sup>, carbon emission factors of different fossil fuels, energy prices of coal, oil and gas for the year of 2012.

## TECHNICAL INTRODUCTION OF THE CGE MODEL

The appendix provides a technical description of the CGE model used in this study

based on ref<sup>23</sup>.

### **Production**

Each producer maximizes profit subject to the production technology. Activity output of each sector follows a nested constant elasticity of substitution (CES) production function. Each sector has two types of production function; one uses the existing capital stock, and another uses new investment.<sup>32</sup> The difference between these two subsectors is the efficiency and mobility of capital among the sectors. Inputs are categorized into material commodities, energy commodities, land, labor, capital and resource.

The producer maximizes its profit by choosing its output level and inputs use, depending on their relative prices subject to its technology. The producer's problem can be expressed as:

#### **Equation 10:**

$$\max: \pi_{r,j} = p_{r,j} \cdot Z_{r,j} - \left( \sum_{i=1}^N p_{r,i} \cdot X_{r,i,j} + \sum_{f=1}^F \omega_{r,f} \cdot V_{r,f,j} \right)$$

subject to:

#### **Equation 11:**

$$Z_{r,j} = v_{r,j} [X_{r,1,j}, X_{r,2,j}, \dots, X_{r,N,j}; V_{r,1,j} \dots, V_{r,f,j}]$$

Where

- $\pi_{r,j}$  Profit of j-th producers in region r,
- $Z_{r,j}$  Output of j-th sector in region r,
- $X_{r,i,j}$  Intermediate inputs of i-th goods in j-th sector in region r,
- $V_{r,f,j}$  f-th primary factor inputs in j-th sector in region r,
- $p_{r,j}$  Price of the j-th composite commodity,
- $\omega_{r,f}$  f-th factor price in region r.
- $v_{r,j}$  Share parameter in the CES production function.

### **Basic sectors**

For the basic production functions, activity output is determined by a fixed coefficient aggregation of non-energy and energy intermediate commodities, and primary factors (Figure S1). The composite of non-energy inputs is in Leontief form. Energy and the value added bundle are nested by valued added and energy inputs. The value added bundle is a CES function of primary factors. The composite of energy inputs is a CES

aggregation of electricity and fossil fuels. Fossil fuels are further disaggregated into five types.

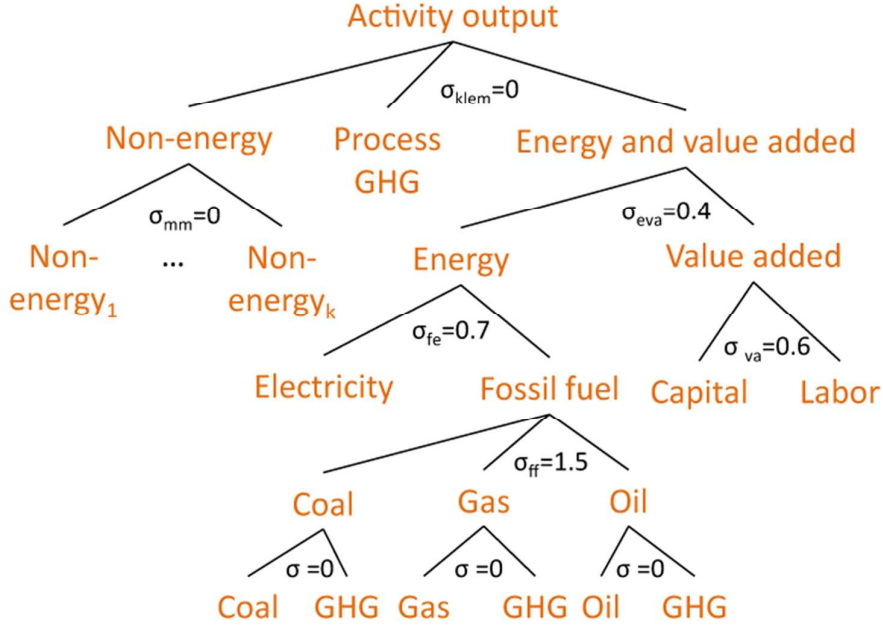

Figure S1: Production Tree of Basic Sectors.  $\sigma$  is elasticity of substitution for inputs

There are four levels in the above production tree. At each level a virtual firm is assumed, each of which aims to maximize the corresponding profit subject to the production technology. At the top-level, output is a Leontief function of the quantities of value-added and aggregate energy input and aggregate intermediate input, associated with process GHG emissions:

**Equation 12:**

$$\max: \pi_{r,j} = p_{r,j} \cdot Z_{r,j} - \left( \sum_{i=1}^N p_{r,i} \cdot X_{r,i,j} + \sum_{f=1}^F \omega_{r,f} \cdot V_{r,f,j} \right)$$

**Equation 13:**

$$\max: \pi_{r,j}^z = p_{r,j}^z \cdot Z_{r,j} - (p_{r,j}^{vae} \cdot QVAE_{r,j} + p_{r,j}^{inta} \cdot QINTA_{r,j} + p_r^{ghg} \cdot QGHG_{r,j,act,ghg})$$

s.t.

**Equation 14:**

$$Q_{r,j} = \min \left( \frac{QVAE_{r,j}}{qvae_{r,j}}, \frac{QINTA_{r,j}}{qinta_{r,j}}, \frac{QGHG_{r,j,act,ghg}}{qghg_{r,j,act,ghg}} \right)$$



Where

- $\pi_{r,j}^z$  Profit of the j-th firm producing gross domestic output  $z_{r,j}$  at the top level,
- $Z_{r,j}$  Gross domestic output of the j-th firm,
- $Q_{r,j}$  Output in sector j of region r,
- $QVAE_{r,j}$  Value added and energy composite input,
- $QINTA_{r,j}$  Composite intermediate input,
- $QGHG_{r,j,act,ghg}$  Process emissions of GHGs per unit of output,
- $p_{r,j}^z$  Price of j-th gross domestic output,
- $p_{r,j}^{vae}$  Price of composite goods of factor and energy,
- $p_{r,j}^{inta}$  Price of composite intermediate goods,
- $p_r^{ghg}$  GHG emission price,
- $qvae_{r,j}$  Technical coefficient expressing the composite amounts of value added and energy inputs required per unit of  $Q_{r,j}$ ,
- $qinta_{r,j}$  Technical coefficient expressing the composite amounts of non-energy intermediate inputs required per unit of  $Q_{r,j}$ ,
- $qghg_{r,j,act,ghg}$  Technical coefficient expressing the process GHG emissions per unit of  $Q_{r,j}$ .

At the second level of the production tree, there are two virtual firms with profit-maximization problems. First, composite value added and energy input is CES aggregation of value added input and total energy input:

**Equation 15:**

$$\max: \pi_{r,j}^{vae} = p_{r,j}^{vae} \cdot QVAE_{r,j} - (p_{r,j}^{va} \cdot QVA_{r,j} + p_{r,j}^{fe} \cdot QFE_{r,j})$$

s.t.

**Equation 16:**

$$QVAE_{r,j} = \alpha_{r,j}^{vae} \cdot (\delta_{r,j}^{vae} \cdot QVA_{r,j}^{-\rho_{r,j}^{vae}} + (1 - \delta_{r,j}^{vae}) \cdot QFE_{r,j}^{-\rho_{r,j}^{vae}})^{\frac{-1}{\rho_{r,j}^{vae}}}$$

Second, aggregate non-energy intermediate input is defined as Leontief function of disaggregated intermediate input:

**Equation 17:**

$$\max: \pi_{r,j}^{inta} = p_{r,j}^{inta} \cdot QINTA_{r,j} - \left( \sum_i p_{r,j}^q \cdot QINT_{r,i,j} \right)$$

s.t.

**Equation 18:**

$$QINTA_{r,j} = \min\left(\frac{QINT_{r,i,j}}{qint_{r,i,j}}\right)$$

Where

- $\pi_{r,j}^{vae}$  Profit of j-th firm producing composite input of value added and energy,
- $\pi_{r,j}^{inta}$  Profit of j-th firm producing composite intermediate input,
- $QVA_{r,j}$  Aggregate value added input,
- $QFE_{r,j}$  Aggregate energy input (electricity and fossil energy),
- $QINT_{r,i,j}$  i-th non-energy inputs in j-th firm,
- $p_{r,j}^{va}$  Price of composite value added input,
- $p_{r,j}^{fe}$  Price of the composite energy input (including electricity and fossil fuel),
- $p_{r,j}^q$  Price of the i-th composite goods,
- $qint_{r,i,j}$  The amounts of each input required per unit of composite intermediate input,
- $\alpha_{r,j}^{vae}$  Shift (or efficiency) parameter in the CES function,
- $\delta_{r,j}^{vae}$  CES share parameter,  $0 \leq \delta_{r,j}^{vae} \leq 1$ ,  $\sum_i \delta_{r,j}^{vae} = 1$ ,
- $\rho_{r,j}^{vae}$  The CES substitution parameter, in which the elasticity of substitution between value added and energy,  $\sigma$ , equals  $\frac{1}{(1+\rho)}$ ,
- $\sigma_{r,j}^{vae}$  Elasticity of substitution between value added bundle and energy.

At the third level of the production tree, there are two virtual firms with profit-maximization problems as well. First, composite value added input is CES aggregation of capital and labor input:

**Equation 19:**

$$\max: \pi_{r,j}^{va} = p_{r,j}^{va} \cdot QVA_{r,j} - (pl_r \cdot QLAB_{r,j} + pk_{r,j} \cdot QCAP_{r,j})$$

s.t.

**Equation 20:**

$$QVA_{r,j} = \alpha_{r,j}^{va} \cdot (\delta_{r,j}^{cap} \cdot QCAP_{r,j}^{-\rho_{r,j}^{va}} + \delta_{r,j}^{lab} \cdot QLAB_{r,j}^{-\rho_{r,j}^{va}})^{\frac{-1}{\rho_{r,j}^{va}}}$$

And composite energy input is CES aggregation of electricity input and fossil fuel input:

**Equation 21:**

$$\max: \pi_{r,j}^{fe} = p_{r,j}^{fe} \cdot QFE_{r,j} - (p_{r,j}^{q,"ele"} \cdot QELE_{r,j} + p_{r,j}^{fos} \cdot QFOS_{r,j})$$

s.t.

**Equation 22:**

$$QFE_{r,j} = \alpha_{r,j}^{fe} \cdot (\delta_{r,j}^{ele} \cdot QELE_{r,j}^{-\rho_{r,j}^{fe}} + (1 - \delta_{r,j}^{ele}) \cdot QFOS_{r,j}^{-\rho_{r,j}^{fe}})^{\frac{-1}{\rho_{r,j}^{fe}}}$$

Where

- $\pi_{r,j}^{va}$  Profit of j-th firm producing composite input of value added,
- $\pi_{r,j}^{fe}$  Profit of j-th firm producing composite input of energy,
- $QCAP_{r,j}$  Capital input required per unit of value added input,
- $QLAB_{r,j}$  Labor input required per unit of value added input,
- $QELE_{r,j}$  Electricity input required per unit of composite energy input,
- $QFOS_{r,j}$  Composite fossil fuel input required per unit of composite energy input,
- $pl_r$  Labor price in region r,
- $pk_{r,j}$  Capital price in j-th sector of region r,
- $p_{r,j}^{q,"ele"}$  Price of the composite goods of electricity,
- $p_{r,j}^{fos}$  Price of composite fossil fuel input in j-th sector,
- $\alpha_{r,j}^{fe}$  Shift (or efficiency) parameter in the CES function,
- $\delta_{r,j}^{fe}, \delta_{r,j}^{cap}, \delta_{r,j}^{lab}$  CES share parameters,  $0 \leq \delta_{r,j}^* \leq 1, \sum_i \delta_{r,j}^* = 1$

- $\rho_{r,j}^{fe}$  CES substitution parameter, in which the elasticity of substitution between electricity and composite fossil fuel,  $\sigma$ , equals  $\frac{1}{(1+\rho)}$ ,
- $\sigma_{r,j}^{va}$  Elasticity of substitution between capital and labor,
- $\sigma_{r,j}^{vae}$  Elasticity of substitution between electricity and fossil fuel.

At the fourth level of the production function, composite fossil fuel is CES aggregation of coal, crude oil, natural gas, coke, petrol oil and manufactured gas:

**Equation 23:**

$$\max: \pi_{r,j}^{fos} = p_{r,j}^{fos} \cdot QFOS_{r,j} - \left( \sum_{fos} p_{r,fos}^q \cdot QFF_{r,fos,j} \right)$$

s.t.

**Equation 24:**

$$QFOS_{r,j} = \alpha_{r,j}^{ff} \cdot \left( \sum_{fos} \delta_{r,j}^{ff} \cdot QFF_{r,fos,j}^{-\rho_{r,j}^{ff}} \right)^{\frac{-1}{\rho_{r,j}^{ff}}}$$

Where

- $\pi_{r,j}^{fos}$  Profit of j-th firm producing composite input of fossil fuel,
- $QFF_{r,fos,j}$  CES shift (or efficiency) parameter,
- $p_{r,fos}^q$  Price of fossil fuel input,
- $\alpha_{r,j}^{ff}$  Shift (or efficiency) parameter in the CES function,
- $\delta_{r,j}^{ff}$  CES share parameter,  $0 \leq \delta_{r,j}^{ff} \leq 1$ ,  $\sum_i \delta_{r,j}^{ff} = 1$
- $\rho_{r,j}^{ff}$  CES substitution parameter, in which the elasticity of substitution among fossil fuels,  $\sigma$ , equals  $\frac{1}{(1+\rho)}$ ,
- $\sigma_{r,j}^{ff}$  Elasticity of substitution among fossil fuels.

### ***Energy transformation sector (except power generation)***

Energy transformation sectors include gas production and supply, petroleum and nuclear fuel processing, and coking. The energy bundle is linked at the top level in order to maintain the first-law of thermal efficiency of the conversion of primary

energy to the secondary energy (Figure S2). Functions at other levels are the same as the basic sectors.

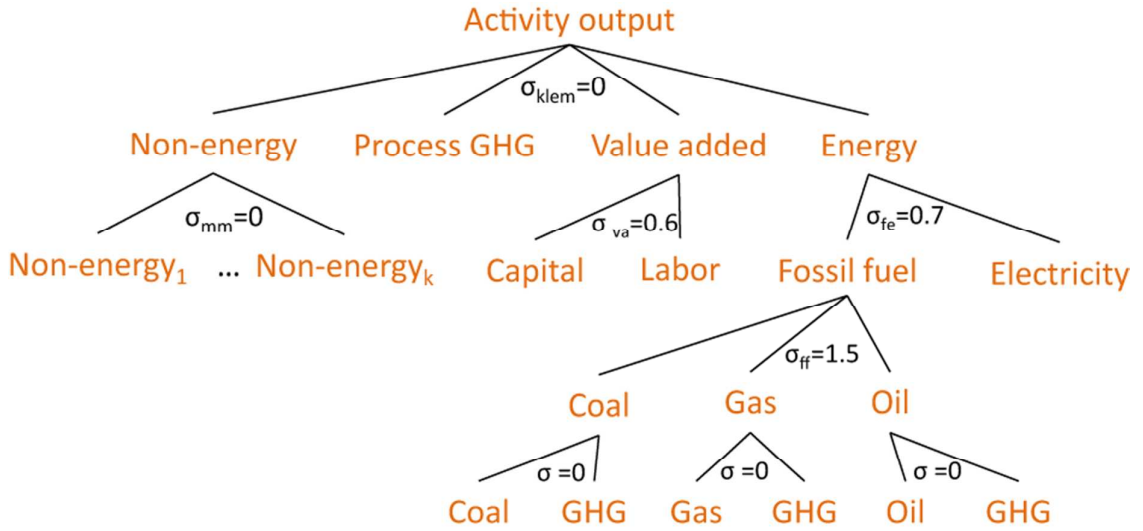

Figure S2: Production Tree of Energy Transformation Sectors.  $\sigma$  is elasticity of substitution for inputs

Thus the problem is expressed in:

**Equation 25:**

$$\max: \pi_{r,j}^z = p_{r,j}^z \cdot Z_{r,j} - (p_{r,j}^{vae} \cdot QVAE_{r,j} + p_{r,j}^{fe} \cdot QFE_{r,j} + p_{r,j}^{inta} \cdot QINTA_{r,j} + p_r^{ghg} \cdot QGHG_{r,j,act,ghg})$$

s.t.

**Equation 26:**

$$Q_{r,j} = \min\left(\frac{QVAE_{r,j}}{qvae_{r,j}}, \frac{QFE_{r,j}}{qfe_{r,j}}, \frac{QINTA_{r,j}}{qinta_{r,j}}, \frac{QGHG_{r,j,act,ghg}}{qghg_{r,j,act,ghg}}\right)$$

Where

- $QFE_{r,j}$  Aggregate energy input (electricity and fossil energy),
- $qfe_{r,j}$  Technical coefficient expressing the aggregate energy inputs required per unit of  $Q_{r,j}$ .

### **Power generation sector**

Electricity is generated by 7 technologies. Disaggregation of the electricity sector into 7 technologies in the base year follows the methodology developed by Sue Wing.<sup>33,34</sup> Production function of each technology is the same as that of energy transformation

sectors. Each technology is perfectly substitutable with another. Electricity output is almost in a linear relationship with energy inputs (Figure S3).

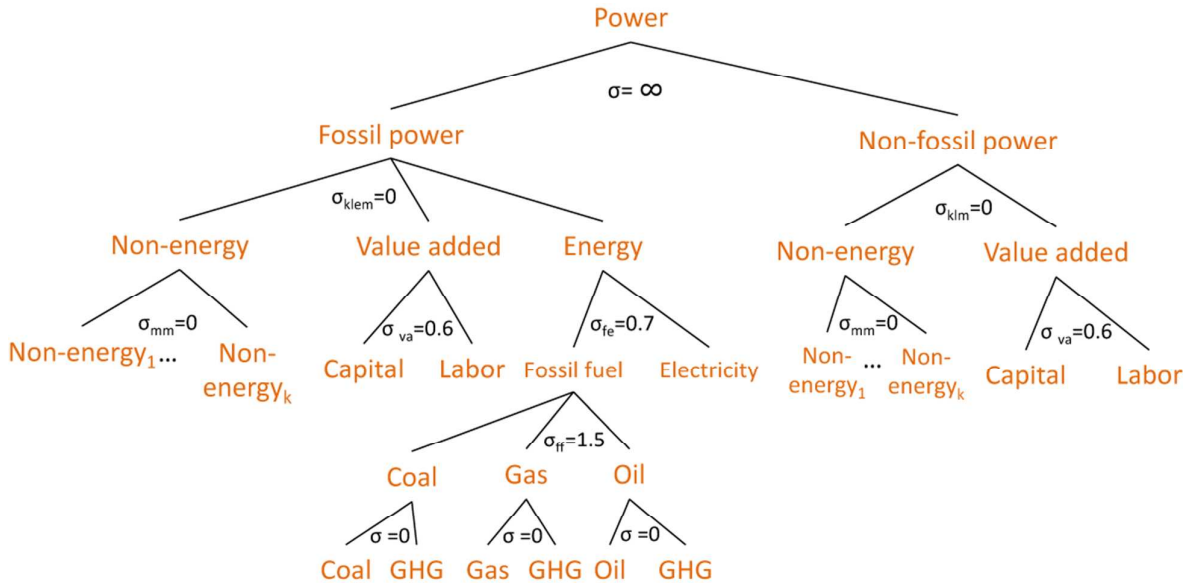

Figure S3: Production Tree of Electricity Generation Sectors.  $\sigma$  is elasticity of substitution for inputs

### Household consumption

Household and government are final consumers. The representative household endows primary factors to the firms and receives income from the rental of primary factors (labor and capital), rents from fixed factors (land and natural resources) and lump- Sum transfer from the government (e.g. carbon tax revenue of government). The income is then used for either investment or final consumption. The objective of household consumption is to maximize utility by choosing levels of goods consumption following Cobb-Douglas preferences, subject to commodity prices and budget constraint. The agent's problem is expressed as:

**Equation 27:**

$$\max: \mu_{r,h}[X_{r,1}^p, \dots, x_{r,i}^p] = A_r^p \cdot \prod_{i=1}^N (X_{r,i}^p)^{\alpha_{r,i}^p}$$

s.t.

**Equation 28:**

$$\begin{aligned}
EH_r &= \sum_i p_{r,j}^q \cdot X_{r,i}^p \\
&= \sum_{f=1}^F \omega_{r,f} \cdot V_{r,f} + \sum_j p_{ld_r} \cdot QLAND_{r,j} + \sum_{res,j} p_{r,j}^{res} \cdot QRES_{r,j} + T_r^{cab} \\
&\quad - T_r^d - S_r^p
\end{aligned}$$

**Equation 29:**

$$T_r^{cab} = pghg_{r,"CO2"} \cdot TEMS_{r,"CO2"}$$

**Equation 30:**

$$T_r^d = \tau_r^d \cdot \sum_f \omega_{r,f} \cdot V_{r,f}$$

**Equation 31:**

$$S_r^p = sr_r^p \cdot \sum_f \omega_{r,f} \cdot V_{r,f}$$

Where

- $\mu_{r,h}$  Utility function of households,
- $EH_r$  Household expenditure,
- $X_{r,i}^p$  Household consumption of i-th commodity,
- $V_{r,f}$  fth primary factor endowment by household,
- $S_r^p$  Household savings,
- $TEMS_{r,"CO2"}$  CO2 emissions in region r,
- $pghg_{r,"CO2"}$  Carbon price,
- $T_r^d$  Direct tax,
- $\tau_r^d$  Direct tax rate,
- $sr_r^p$  Average propensity to save by the household,
- $\omega_{r,f}$  Price of the f-th primary factor,,
- $A_r^p$  Scaling parameter in Cobb-Douglas function,
- $\alpha_{r,i}^p$  Share parameter in Cobb-Douglas function,  $0 \leq \alpha_{r,i}^p \leq 1$ ,  $\sum_i \alpha_{r,i}^p = 1$ .

### Government

The government is assumed to collect taxes, including direct tax on household income, ad valorem production tax (indirect tax) on gross domestic output, ad valorem import

tariff on imports and carbon tax. Based on a Cobb-Douglas demand function,<sup>35</sup> the government spends its revenue on public services which are provided to the whole society and on the goods and services which are provided to the households free of charge or at low prices. The model assumes that the revenue from carbon tax is recycled to the representative agent as a lump-Sum transfer.

**Equation 32:**

$$\max: \mu_{r,g}[x_{r,1}^g, \dots, x_{r,i}^g] = A_r^g \cdot \prod_{i=1}^N (x_{r,i}^g)^{\alpha_{r,i}^g}$$

s.t.

**Equation 33:**

$$\sum_i p_{r,i} \cdot x_{r,i}^g = T_r^d + \sum_j T_{r,j}^z + \sum_j T_{r,j}^m - S^g$$

**Equation 34:**

$$T_{r,j}^z = \tau_{r,j}^z \cdot p_{r,j} \cdot Z_{r,j}$$

**Equation 35:**

$$T_{r,i}^m = \tau_{r,i}^m \cdot pm_{r,i} \cdot M_{r,i}$$

**Equation 36:**

$$S_r^g = sr_r^g \cdot (T_r^d + \sum_j T_{r,j}^z + \sum_j T_{r,j}^m)$$

Where

- $\mu_{r,g}$  Utility function of government,
- $x_{r,i}^g$  Government consumption of i-th commodity,
- $S_r^g$  Government savings,
- $T_{r,j}^z$  Production tax on the j-th commodity,
- $T_{r,j}^m$  Import tariff on the j-th commodity,
- $\tau_{r,j}^z$  Production tax rate on the j-th commodity,
- $\tau_{r,i}^m$  Import tariff rate on the i-th commodity,



- $sr_r^g$  Average propensity to save by the government,
- $Z_{r,j}$  Gross domestic output of the j-th commodity,
- $M_{r,i}$  Import of the i-th commodity,
- $pm_{r,i}$  Price of the i-th imported commodity,
- $A_r^g$  Scaling parameter in Cobb-Douglas function,
- $\alpha_{r,i}^g$  Share parameter in Cobb-Douglas function,  $0 \leq \alpha_{r,i}^g \leq 1$ ,  $\sum_i \alpha_{r,i}^g = 1$ .

### Investment and savings

Investment is an important part of final demand. In the CGE model a virtual agent is assumed for investment which receives all the savings from the household, government and the external sector to purchase goods for domestic investment. The virtual investment agent is assumed to maximize the utility based on a Cobb-Douglas demand function subject to its (virtual) income constraint. Mathematically, the investment problems can be described as follows:

**Equation 37:**

$$\max: \mu_{r,v}[x_{r,1}^v, \dots, x_{r,i}^v] = A_r^v \cdot \prod_{i=1}^N (x_{r,i}^v)^{\alpha_{r,i}^v}$$

s.t.

**Equation 38:**

$$\sum_i p_{r,i} \cdot x_{r,i}^v = S_r^p \frac{1}{r} + \varepsilon \cdot S_r^f$$

Where

- $\mu_{r,v}$  Utility of virtual investment agent,
- $S_r^f$  Current account deficits in foreign currency terms (or alternatively foreign savings),
- $\varepsilon$  Foreign exchange rate,
- $x_{r,1}^v$  Demand for the i-th investment goods,
- $A_r^v$  Scaling parameter in Cobb-Douglas function,
- $\alpha_{r,i}^v$  Share parameter in Cobb-Douglas function,  $0 \leq \alpha_{r,i}^v \leq 1$ ,  $\sum_i \alpha_{r,i}^v = 1$ .

### International transaction

The model is an open economy model that includes interaction of commodity trade with the rest of the world. Like most other country CGE models, this model assumes the small open economy, meaning that an economy is small enough for its policies not to alter world prices or incomes. The implicit implication of small-country assumption is that export and import prices are exogenously given for the economy. In this study, future international prices are fixed to be the same level for non-energy commodities whereas increase by 3% yearly for energy commodities compared to the 2005 level.

Two types of price variables are distinguished. One is prices in terms of the domestic currency  $p_i^e$  and  $p_i^m$ ; the other is prices in terms of the foreign currency  $p_i^{We}$  and  $p_i^{Wm}$ . They are linked with each other as follows:

**Equation 39:**

$$p_i^e = \varepsilon \cdot p_i^{We}$$

**Equation 40:**

$$p_i^m = \varepsilon \cdot p_i^{Wm}$$

Furthermore, it is assumed that the economy faces balance of payments constraints, which is described with export and import prices in foreign currency terms:

**Equation 41:**

$$\sum_i p_i^{We} \cdot E_{r,i} = \sum_i p_i^{Wm} \cdot M_i$$

Where

- $E_{r,i}$  Export of i-th commodity in region r,
- $M_{r,i}$  Import of i-th commodity in region r,
- $p_i^{We}$  Export price in terms of foreign currency,
- $p_i^e$  Export price in terms of domestic currency,
- $p_i^{Wm}$  Import price in terms of foreign currency,
- $p_i^m$  Import price in terms of domestic currency.

Substitution between imports and domestic goods

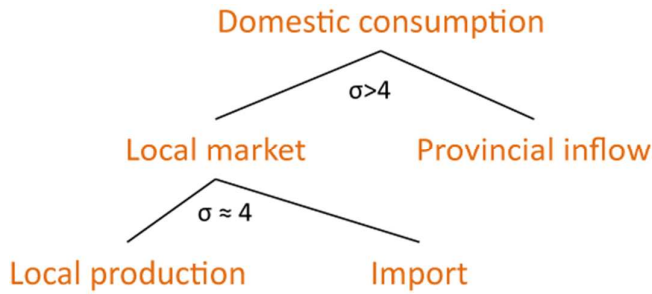

Figure S4: Nesting of Imported Goods, Locally Produced Goods and Goods Produced in Other Provinces.  $\sigma$  is elasticity of substitution for inputs

The Armington assumption is adopted, i.e., the domestic and imported goods are imperfectly substitutable for each other, which implies that households and firms don't directly consume or use imported goods but instead a so-called "Armington composite goods", which is made up of imported and locally produced goods as well as goods produced in other provinces by a two-level nested CES function (Figure S4).

Import activity is described by the bottom nesting of Figure S4. In the CGE model, the Armington composite goods at this level is created by virtual firms which maximize their profits by choosing a proper combination of imported and locally produced goods. The solution of their profit-maximization problem leads to their input demands for imported and domestic goods, which depend on the corresponding relative prices domestic and imported goods. Mathematically, this problem can be expressed as:

**Equation 42:**

$$\max: \pi_{r,i}^{md} = p_{r,i}^{md} \cdot Q_{r,i}^{md} - [(1 + \tau_{r,i}^m) \cdot p_i^m \cdot M_{r,i} + p_{r,i}^d \cdot D_{r,i}^d]$$

s.t.

**Equation 43:**

$$Q_{r,i}^{md} = \alpha_{r,i}^{md} \cdot (\delta_{r,i}^m \cdot M_{r,i}^{-\rho_{r,i}^{md}} + \delta_{r,j}^d \cdot D_{r,i}^{-\rho_{r,i}^{md}})^{\frac{-1}{\rho_{r,j}^{md}}}$$

Where

- $\pi_{r,i}^{md}$  Profit of the firm producing the i-th Armington composite goods of import and locally produced goods,
- $Q_{r,i}^{md}$  The i-th Armington composite goods of import and locally produced goods,
- $D_{r,i}^d$  The i-th locally produced goods,

- $p_{r,i}^{md}$  Armington price of the i-th imported and locally produced goods,
- $p_{r,i}^d$  Price of the i-th locally produced goods,
- $\tau_{r,i}^m$  Import tariff rate on the i-th commodity,
- $\alpha_{r,i}^{md}$  Shift (or efficiency) parameter in the Armington composite goods production function,
- $\delta_{r,i}^m, \delta_{r,j}^d$  Input share parameters in the Armington composite goods production function ( $0 \leq \delta_{r,i}^m \leq 1, 0 \leq \delta_{r,j}^d \leq 1, \delta_{r,i}^m + \delta_{r,i}^d = 1$ ),
- $\rho_{r,i}^{md}$  The CES substitution parameter, in which the elasticity of substitution between imported and domestic goods,  $\sigma$ , equals  $\frac{1}{(1+\rho)}$ .

Then the composite imported and locally produced goods will be further aggregated with the goods produced in other provinces to form the final Armington composite goods that are consumed by households, government and as intermediate inputs by firms.

#### ***Transformation between exports and domestic goods***

On the supply side, the produced commodities are distributed to international market, local market and market in other provinces by a two-level nested constant elasticity of transformation function. Similar to the treatment of import, a virtual firm is assumed for each commodity which transforms the gross domestic output into exports and domestic goods as follows:

**Equation 44:**

$$\max: \pi_{r,i}^{dx} = (p_i^e \cdot E_{r,i} + p_{r,i}^{dd} \cdot D_{r,i}^s) - (1 + \tau_{r,i}^z) \cdot p_{r,i}^z \cdot Q_{r,i}^{dx}$$

s.t.

**Equation 45:**

$$Q_{r,i}^{dx} = \alpha_{r,i}^{dx} \cdot (\delta_{r,i}^e \cdot E_{r,i}^{\rho_{r,i}^{dx}} + \delta_{r,j}^d \cdot D_{r,i}^s \cdot \rho_{r,i}^{dx})^{\frac{1}{\rho_{r,i}^{dx}}}$$

Where

- $\pi_{r,i}^{dx}$  Profit of the firm engaged in the i-th transformation,
- $Q_{r,i}^{dx}$  Gross domestic output of the i-th goods,

- $D_{r,i}^S$  i-th goods supplied to domestic market,
- $p_{r,i}^z$  Price of the i-th gross domestic output,
- $p_{r,i}^{dd}$  Price of domestically supplied goods,
- $\tau_{r,i}^z$  Production tax rate on the i-th commodity,
- $\alpha_{r,i}^{dx}$  Shift (or efficiency) parameter in the transformation function,
- $\delta_{r,i}^e, \delta_{r,j}^d$  Share parameters in the transformation function ( $0 \leq \delta_{r,i}^e \leq 1, 0 \leq \delta_{r,j}^d \leq 1, \delta_{r,i}^e + \delta_{r,i}^d = 1$ ),
- $\rho_{r,i}^{dx}$  Transformation elasticity parameter, in which the elasticity of substitution between imported and domestic goods,  $\sigma$ , equals  $\frac{1}{\rho-1}$ .

It should be noted that the goods supplied to the domestic market at this level,  $D_{r,i}^S$ , will be further distributed to local market and market in other provinces through inter-provincial trade, which will be described in the next section.

### ***Inter-provincial trade***

An important feature of this model is that it is a country model in which inter-provincial trade is treated. Similar to the case of international trade, Armington assumption is adopted to distinguish between locally produced commodity and commodity produced by firms in other provinces, and CES and CET functions are employed to describe commodity inflow from and outflow to all provinces, respectively.

### ***Substitution commodity between local market and inflow from other provinces***

This section describes the top-level nesting of Figure S4 which treats inter-provincial inflow of commodity. By this stage the commodity in the local market is an aggregation of locally produced and imported goods, which needs to be further aggregated with goods produced in other provinces to form the final Armington composite goods to be consumed by final consumers and firms. The treatment is similar to import:

**Equation 46:**

$$\max: \pi_{r,i}^{dd} = p_{r,i}^a \cdot Q_{r,i}^{dd} - [p_{r,i}^{md} \cdot Q_{r,i}^{md} + \sum_{rr} p_{rr,i}^{inf} \cdot D_{rr,r,i}^{inf}]$$

s.t.

**Equation 47:**

$$Q_{r,i}^{dd} = \alpha_{r,i}^{dd} \cdot (\delta_{r,i}^{md} \cdot Q_{r,i}^{md} - \rho_{r,i}^{dd} + \sum_{rr} \delta_{rr,r,i}^{inf} \cdot D_{rr,r,i}^{inf} - \rho_{r,i}^{dd})^{\frac{-1}{\rho_{r,i}^{dd}}}$$

Where

- $\pi_{r,i}^{dd}$  Profit of the firm producing the i-th Armington composite goods of local market and inflow from other provinces,
- $Q_{r,i}^{dd}$  Armington composite goods,
- $D_{rr,r,i}^{inf}$  The i-th goods inflowing from region rr to region r,
- $p_{r,i}^a$  Armington price taken by the final consumers and firms,
- $p_{rr,i}^{inf}$  Price of the i-th goods inflowing from province rr to region r,
- $\alpha_{r,i}^{dd}$  Shift (or efficiency) parameter in the Armington composite goods production function,
- $\delta_{r,i}^{md}$ ,  $\delta_{rr,r,i}^{inf}$  Input share parameters in the Armington composite goods production function ( $0 \leq \delta_{r,i}^{md} \leq 1$ ,  $0 \leq \delta_{rr,r,i}^{inf} \leq 1$ ,  $\delta_{r,i}^{md} + \sum_{rr} \delta_{rr,r,i}^{inf} = 1$ ),
- $\rho_{r,i}^{dd}$  The CES substitution parameter, in which the elasticity of substitution between imported and domestic goods,  $\sigma$ , equals  $\frac{1}{(1+\rho)}$ .

***Transformation between goods sold in local market and outflowing to other provinces***

Goods supplied to the domestic market,  $D_{r,i}^s$ , will be further distributed to local market and market in other provinces through, similar to the treatment of export, a CET function as follows:

**Equation 48:**

$$\max: \pi_{r,i}^{pp} = (p_i^d \cdot D_{r,i}^{local} + \sum_{rr} p_{rr,i}^{out} \cdot D_{r,rr,i}^{out}) - p_{r,i}^{dd} \cdot D_{r,i}^s$$

s.t.

**Equation 49:**

$$Q_{r,i}^{pp} = \alpha_{r,i}^{pp} \cdot (\delta_{r,i}^{local} \cdot D_{r,i}^{local} \rho_{r,i}^{pp} + \sum_{rr} \delta_{r,rr,i}^{out} \cdot D_{r,rr,i}^{out} \rho_{r,i}^{pp})^{\frac{1}{\rho_{r,i}^{pp}}}$$

Where

- $\pi_{r,i}^{pp}$  Profit of the firm engaged in the i-th transformation,
- $Q_{r,i}^{pp}$  Out of the i-th goods supplied to local and other provinces' markets,
- $D_{r,i}^{local}$  i-th Goods supplied to local market,
- $D_{r,rr,i}^{out}$  i-th Goods outflowing from region r to other province rr,
- $p_{rr,i}^{out}$  Price of the i-th Goods outflowing to other province rr,
- $\alpha_{r,i}^{pp}$  Shift (or efficiency) parameter in the transformation function,
- $\delta_{r,i}^{local}$ ,  $\delta_{r,rr,i}^{out}$  Share parameters in the transformation function ( $0 \leq \delta_{r,i}^{local} \leq 1$ ,  
 $0 \leq \delta_{r,rr,j}^{out} \leq 1$ ,  $\delta_{r,i}^{local} + \sum_{rr} \delta_{r,rr,i}^{out} = 1$ ),
- $\rho_{r,i}^{pp}$  Transformation elasticity parameter, in which the elasticity of substitution between imported and domestic goods,  $\sigma$ , equals  $\frac{1}{\rho-1}$ .

### Market clearance conditions

The above sections describe the behavior of economic agents such as the households, firms, government, investment agents and the interactions with other provinces and the rest of the world. The final step is to impose the market-clearing conditions to all commodities and factor markets as follows:

**Equation 50:**

$$Q_{r,i} = x_{r,i}^p + x_{r,i}^g + x_{r,i}^v + \sum_j x_{r,i,j}$$

**Equation 51:**

$$\sum_j v_{r,f,j} = V_{r,f}$$

## Macro closure

In a CGE model, the issue of macro closure is the choice of exogenous variables among all variables in the model, mainly including investment and saving macro closure, and current account balance macro closure. In this model, investment is exogenously assumed. In addition, foreign exchange rate is fixed and thus balanced of payment is an endogenous variable.

**Table S2: GDP Loss, Welfare Loss and Sectoral Output Loss Rate Relative to Reference Scenarios in 2030**

|                   | BaU0   | INDC1  | INDC2  | BaU3  | INDC3  |
|-------------------|--------|--------|--------|-------|--------|
| GDP               | 2.26%  | 0.95%  | 0.89%  | 0.37% | 0.34%  |
| Welfare           | 3.14%  | 1.07%  | 0.99%  | 0.51% | 0.38%  |
| Agriculture       | 9.26%  | 3.88%  | 3.62%  | 1.82% | 1.41%  |
| Mining            | -0.24% | 0.06%  | 0.06%  | 0.43% | 0.02%  |
| Food              | 3.05%  | 1.80%  | 1.68%  | 0.59% | 0.65%  |
| Textile           | 3.72%  | 2.08%  | 1.94%  | 0.74% | 0.75%  |
| Paper             | 0.00%  | 1.80%  | 1.68%  | 0.00% | 0.65%  |
| Oil Refinery      | 0.51%  | 0.14%  | 0.13%  | 0.03% | 0.05%  |
| Direct Energy     | 1.68%  | 0.61%  | 0.57%  | 0.19% | 0.22%  |
| Chemicals         | 2.81%  | 0.84%  | 0.79%  | 0.58% | 0.30%  |
| Cement            | 2.70%  | 0.54%  | 0.51%  | 0.55% | 0.19%  |
| Iron & steel      | 0.25%  | -0.51% | -0.47% | 0.12% | -0.18% |
| Metal Products    | 2.33%  | 0.26%  | 0.24%  | 0.40% | 0.09%  |
| Machinery         | 2.51%  | 0.60%  | 0.55%  | 0.52% | 0.21%  |
| Electronic        | 1.62%  | 0.93%  | 0.87%  | 0.36% | 0.34%  |
| Other Manufacture | 1.72%  | 0.15%  | 0.14%  | 0.07% | 0.05%  |
| Electricity       | 1.82%  | 0.00%  | 0.00%  | 0.26% | 0.00%  |
| Construction      | 1.06%  | 0.29%  | 0.27%  | 0.21% | 0.10%  |
| Transport         | 0.82%  | 0.36%  | 0.33%  | 0.15% | 0.13%  |
| Service           | 3.27%  | 1.58%  | 1.47%  | 0.61% | 0.57%  |

## Reference

(1) Amann, M.; Klimont, Z.; Wagner, F., Regional and Global Emissions of Air Pollutants: Recent Trends and Future Scenarios. *Annual Review of Environment and Resources* **2013**, *38*, (1), 31-55.

(2) Amann, M.; Bertok, I.; Borken-Kleefeld, J.; Cofala, J.; Heyes, C.; Höglund-Isaksson, L.; Klimont, Z.; Nguyen, B.; Posch, M.; Rafaj, P.; Sandler, R.; Schöpp, W.; Wagner, F.; Winiwarter, W., Cost-effective control of air quality and greenhouse gases in Europe: Modeling and policy applications. *Environ. Modelling Software* **2011**, *26*, (12), 1489-1501.



- (3) Xie, Y.; Dai, H.; Dong, H.; Hanaoka, T.; Masui, T., Economic Impacts from PM2.5 Pollution-Related Health Effects in China: A Provincial-Level Analysis. *Environ. Sci. Technol.* **2016**, *50*, (9), 4836-4843.
- (4) Pope, C. A., III; Burnett, R. T.; Thun, M. J.; Calle, E. E.; Krewski, D.; Ito, K.; Thurston, G. D., Lung cancer, cardiopulmonary mortality, and long-term exposure to fine particulate air pollution. *JAMA* **2002**, *287*, (9), 1132-1141.
- (5) Chen, R.; Kan, H.; Chen, B.; Huang, W.; Bai, Z.; Song, G.; Pan, G., Association of particulate air pollution with daily mortality: the China Air Pollution and Health Effects Study. *American Journal of Epidemiology* **2012**, *175*, (11), 1173.
- (6) Hoek, G.; Krishnan, R. M.; Beelen, R.; Peters, A.; Ostro, B.; Brunekreef, B.; Kaufman, J. D., Long-term air pollution exposure and cardio-respiratory mortality: a review. *Environ. Health* **2013**, *12*, (1), 43.
- (7) Apte, J. S.; Marshall, J. D.; Cohen, A. J.; Brauer, M., Addressing Global Mortality from Ambient PM2.5. *Environ. Sci. Technol.* **2015**, *49*, (13), 8057-8066.
- (8) Burnett, R. T.; Arden Pope III, C.; Ezzati, M.; Olives, C.; Lim, S. S.; Mehta, S.; Shin, H. H.; Singh, G.; Hubbell, B.; Brauer, M.; Ross Anderson, H.; Smith, K. R.; Balmes, J. R.; Bruce, N. G.; Kan, H.; Laden, F.; Prüss-Ustün, A.; Turner, M. C.; Gapstur, S. M.; Diver, W. R.; Cohen, A., An integrated risk function for estimating the global burden of disease attributable to ambient fine particulate matter exposure. *Environ. Health Perspect.* **2014**, *122*, (4), 397-403.
- (9) Cao, J.; Yang, C.; Li, J.; Chen, R.; Chen, B.; Gu, D.; Kan, H., Association between long-term exposure to outdoor air pollution and mortality in China: A cohort study. *J. Hazard. Mater.* **2011**, *186*, (2-3), 1594-1600.
- (10) Pope, C. A., III; Burnett, R. T.; Thurston, G. D.; Thun, M. J.; Calle, E. E.; Krewski, D.; Godleski, J. J., Cardiovascular Mortality and Long-Term Exposure to Particulate Air Pollution: Epidemiological Evidence of General Pathophysiological Pathways of Disease. *Circulation* **2004**, *109*, (1), 71-77.
- (11) Berry, J.; Holland, M.; Watkiss, P., *ExternE: Externalities of energy vol. 2. methodology*. European Commission: 1995.
- (12) Fujimori, S.; Masui, T.; Matsuoka, Y., Development of a global computable general equilibrium model coupled with detailed energy end-use technology. *Appl. Energy* **2014**, *128*, 296-306.
- (13) Fujimori, S.; Masui, T.; Matsuoka, Y., Gains from emission trading under multiple stabilization targets and technological constraints. *Energy Economics* **2015**, *48*, 306-315.
- (14) Böhringer, C.; Löschel, A., Climate policy beyond Kyoto: Quo Vadis? *Kyklos* **2005**, *58*, (4), 467-493.
- (15) Wang, K.; Wang, C.; Chen, J., Analysis of the economic impact of different Chinese climate policy options based on a CGE model incorporating endogenous technological change. *Energy Policy* **2009**, *37*, (8), 2930-2940.
- (16) Zhang, Z. X., Macroeconomic Effects of CO2 Emission Limits: A Computable General Equilibrium Analysis for China. *J. Policy Modeling* **1998**, *20*, (2), 213-250.
- (17) Dai, H.; Masui, T.; Matsuoka, Y.; Fujimori, S., The impacts of China's household consumption expenditure patterns on energy demand and carbon emissions towards 2050. *Energy Policy* **2012**, *50*, 736-750.
- (18) Rutherford, T. F., Applied general equilibrium modeling with MPSGE as a GAMS subsystem: An overview of the modeling framework and syntax. *Computational Economics* **1999**, *14*, (1), 1-46.
- (19) Dai, H.; Masui, T.; Matsuoka, Y.; Fujimori, S., Assessment of China's climate commitment and

- non-fossil energy plan towards 2020 using hybrid AIM/CGE model. **2011**, *39*, (5), 2875-2887.
- (20) Dai, H.; Xie, X.; Xie, Y.; Liu, J.; Masui, T., Green growth: The economic impacts of large-scale renewable energy development in China. *Appl. Energy* **2016**, *162*, 435-449.
- (21) Cheng, B.; Dai, H.; Wang, P.; Zhao, D.; Masui, T., Impacts of carbon trading scheme on air pollutant emissions in Guangdong Province of China. *Energy for Sustainable Development* **2015**, *27*, 174-185.
- (22) Cheng, B.; Dai, H.; Wang, P.; Xie, Y.; Chen, L.; Zhao, D.; Masui, T., Impacts of low-carbon power policy on carbon mitigation in Guangdong Province, China. *Energy Policy* **2016**, *88*, 515-527.
- (23) Dai, H. Integrated assessment of China's provincial low carbon economy development towards 2030: Jiangxi province as an example. Tokyo Institute of Technology, Tokyo, 2012.
- (24) Dong, H.; Dai, H.; Dong, L.; Fujita, T.; Geng, Y.; Klimont, Z.; Inoue, T.; Bunya, S.; Fujii, M.; Masui, T., Pursuing air pollutant co-benefits of CO<sub>2</sub> mitigation in China: A provincial leveled analysis. *Appl. Energy* **2015**, *144*, 165-174.
- (25) Tian, X.; Dai, H.; Geng, Y., Effect of household consumption changes on regional low-carbon development: A case study of Shanghai. *China Population, Resources and Environment* **2016**, (05), 55-63.
- (26) Tian, X.; Geng, Y.; Dai, H.; Fujita, T.; Wu, R.; Liu, Z.; Masui, T.; Yang, X., The effects of household consumption pattern on regional development: A case study of Shanghai. *Energy* **2016**, *103*, 49-60.
- (27) Wang, P.; Dai, H.; Ren, S.; Zhao, D.; Masui, T., Achieving Copenhagen target through carbon emission trading: Economic impacts assessment in Guangdong Province of China. *Energy* **2015**, *79*, (0), 212-227.
- (28) National Bureau of Statistics of China (NBS), *Input-Output Tables of China 2007*. China Statistics Press: Beijing, 2011.
- (29) National Bureau of Statistics of China (NBS), *Input-Output Tables of China 2012*. China Statistics Press: Beijing, 2015.
- (30) National Bureau of Statistics of China (NBS), *China Energy Statistical Yearbook 2008*. China Statistics Press: Beijing, 2008.
- (31) National Bureau of Statistics of China (NBS), *China Energy Statistical Yearbook 2012*. China Statistics Press: Beijing, 2012.
- (32) Masui, T.; Matsumoto, K.; Hijioka, Y.; Kinoshita, T.; Nozawa, T.; Ishiwatari, S.; Kato, E.; Shukla, P. R.; Yamagata, Y.; Kainuma, M., An emission pathway for stabilization at 6 Wm<sup>-2</sup> radiative forcing. *Climatic Change* **2011**, *109*, (1), 59.
- (33) Wing, I. S., The synthesis of bottom-up and top-down approaches to climate policy modeling: Electric power technologies and the cost of limiting US CO<sub>2</sub> emissions. *Energy Policy* **2006**, *34*, (18), 3847-3869.
- (34) Wing, I. S., The synthesis of bottom-up and top-down approaches to climate policy modeling: Electric power technology detail in a social accounting framework. *Energy Economics* **2008**, *30*, (2), 547-573.
- (35) Hertel, T. W.; Tsigas, M. E., Structure of GTAP. In *Global Trade Analysis: Modeling and Applications*, Hertel, T. W., Ed. Cambridge University Press: New York, 2004; p 48.
